# Supplementary material
Source: Springer Nature journal article supplement (https://www.springermedizin.de/resource/supplementary/13063_2009_454_MOESM5_ESM.pdf/9618252)

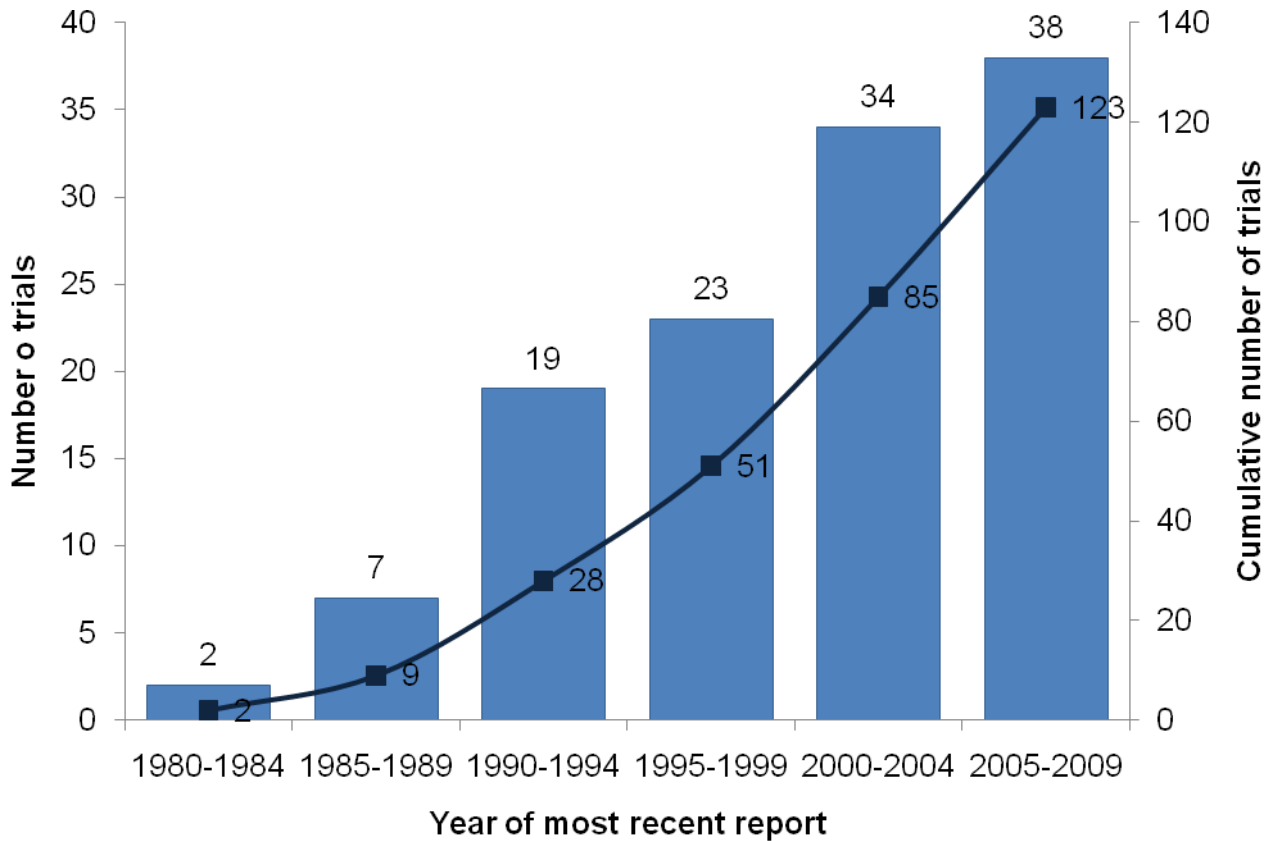

■ Number of trials

■ Cumulative number of trials

Supplement: MOESM5 [file 9618252]
